# Supplementary material
Source: publisher site journal article supplement (https://www.dovepress.com/get_supplementary_file.php?f=254108.docx)
Supplement: Supplementary file 1 [file get_supplementary_file.php]

**Supplementary materials**


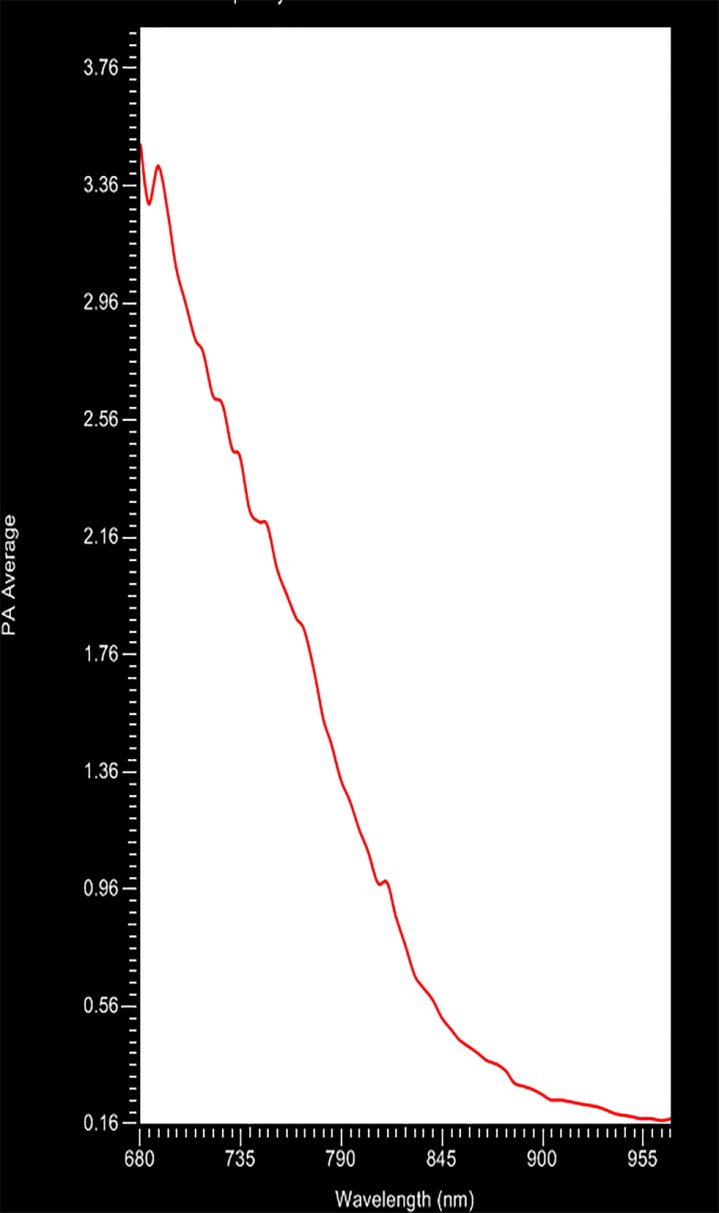


Supplementary Figure S1. The most optimal wavelength for PA imaging by full-wavelength scanning.


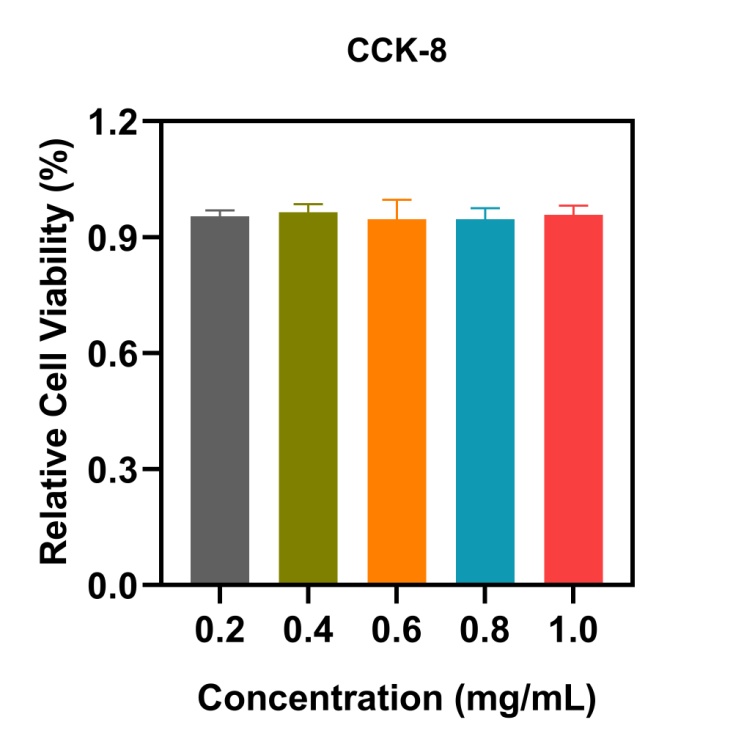


Supplementary Figure S2. The relative cell viabilities of MCF-7 cell incubated with different concentrations for 24h.


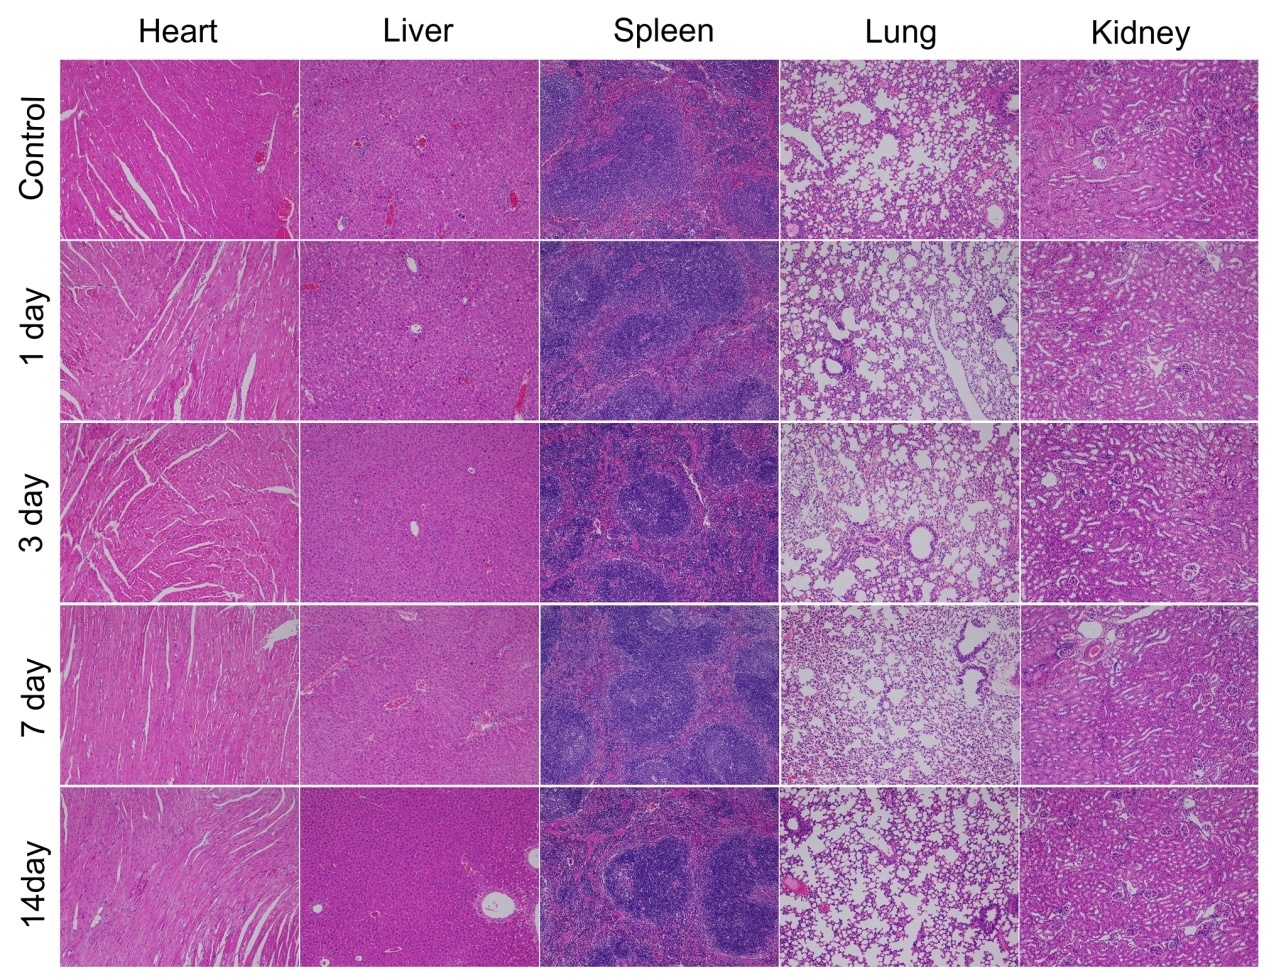


Supplementary Figure S3. H&E staining of the major organs (heart, liver, spleen, lung, and kidney) of the

treated-mice at control(pre-injection) and 1, 3, 7, and 14 days post-injection with A-FP NPs via

the tail vein. The scale bars are 50 μm.
